# Supplementary material
Source: HighWire-hosted journal article supplement (https://er.uwpress.org/content/suppl/2024/04/04/42.1.64)
Supplement: Gannon_SuppMat_S4.pdf [file Gannon_SuppMat_S4.pdf]

Supplementary Material, Table S4. Adjunct research conducted on NPAM sites. Projects include retrospective analyses conducted by the NPAM advisory team and collaborations with partners conducting research on NPAM units.

| <b>Primary Research Question</b>                                                                                                                                                                                  | <b>Approach</b>        | <b>Citation</b>                  |
|-------------------------------------------------------------------------------------------------------------------------------------------------------------------------------------------------------------------|------------------------|----------------------------------|
| Do abiotic factors (e.g., prior year precipitation, ecological site, long-term climate) influence the response of native and non-native plant cover to management actions?                                        | Retrospective analysis | Work in progress                 |
| Does the effectiveness of grazing treatments to reduce non-native and increase native plants in mixed-grass prairies vary with the intensity of the treatments?                                                   | Retrospective analysis | Work in progress                 |
| Can we apply the smooth brome phenological window described in Willson and Stubbendeick (2000) to increase treatment effectiveness in tallgrass prairies?                                                         | Retrospective analysis | USFWS unpub. data                |
| Is there a correlation between smooth brome morphology stages and accumulated growing degree days?                                                                                                                | Cooperator research    | Priester et al. (2019)           |
| Can training and visual guides reduce observer variability in identifying smooth brome morphological stages?                                                                                                      | Cooperator research    | Dupey (2014)                     |
| Are species-level investigations required to understand competition between <i>P. pratensis</i> , <i>B. inermis</i> , and a variety of native plant species?                                                      | Cooperator research    | Kobiela et al. (2017)            |
| Which species of native grasses and/or forbs increase in response to management (burning and grazing) that act to decrease relative cover of <i>P. pratensis</i> and <i>B. inermis</i> ?                          | Cooperator research    | Ongoing research, Coleman (2022) |
| Are the pattern and degree of invasion by <i>P. pratensis</i> , <i>B. inermis</i> , and other non-native plants on Service-owned prairies similar to that occurring on nearby prairies held in private ownership? | Cooperator research    | Ongoing research, Coleman (2022) |
| How are grassland songbirds affected by alternative management actions implemented under NPAM?                                                                                                                    | Cooperator research    | Igl et al. (2018)                |
